# Supplementary material
Source: publisher figshare collection journal article supplement (https://tandf.figshare.com/ndownloader/files/13824797)
Supplement: Supplementary file 1 [file 13824797]

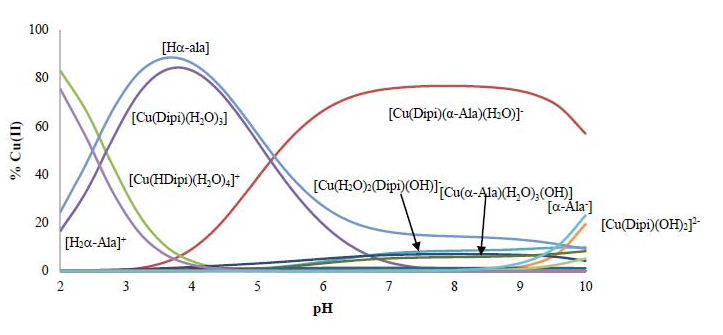


Species distribution diagram for the system Cu(II)-H2Dipi- Hα-Ala [Cu(II)] = 3,0 mM, R = 1:1:1


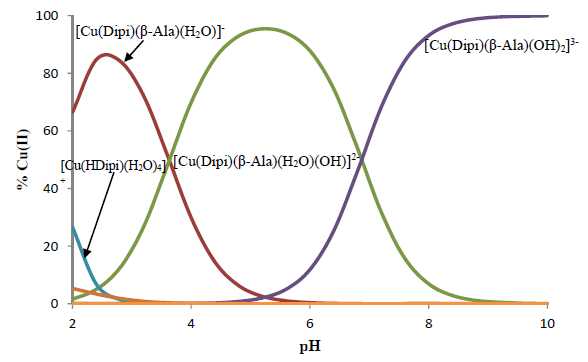


Species distribution diagram for the system Cu(II)- H2Dipi - Hβ-Ala [Cu(II)] = 3,0 mM, R = 1:1:1


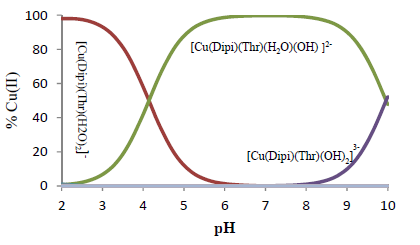


Species distribution diagram for the system Cu(II)- H2Dipi - HThr[Cu(II)] = 3,0 mM, R = 1:1:1


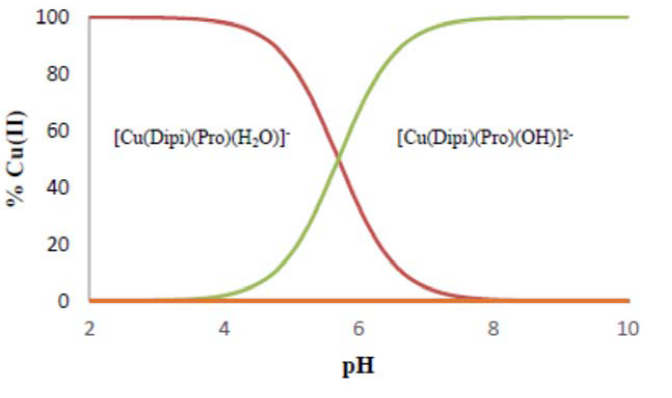


Species distribution diagram for the system Cu(II)- H2Dipi - HPro[Cu(II)] = 3,0 mM, R = 1:1:1


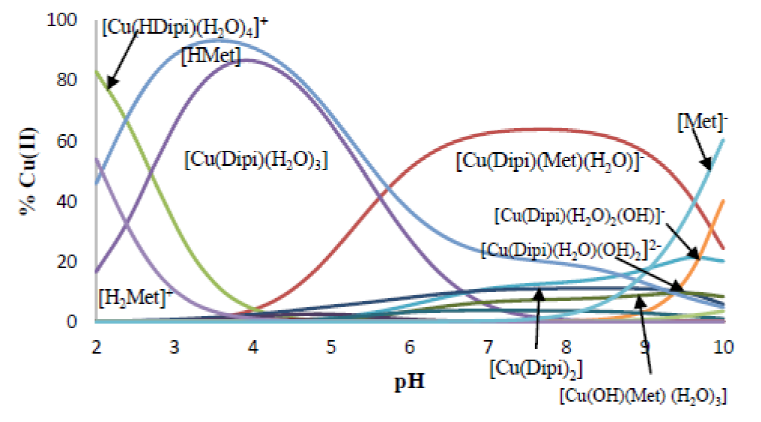


Species distribution diagram for the system Cu(II)- H2Dipi - HMet[Cu(II)] = 3,0 mM, R = 1:1:1


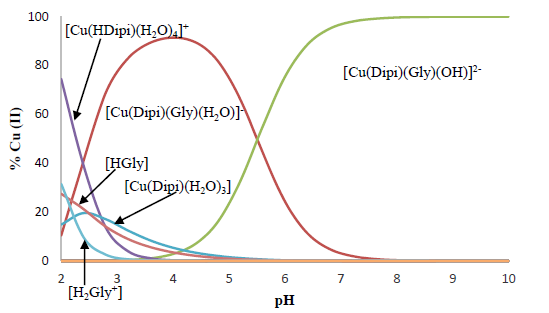


Species distribution diagram for the system Cu(II)- H2Dipi - HGly [Cu(II)] = 3,0 mM, R = 1:1:1


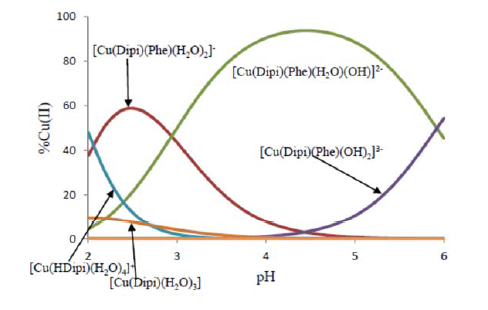


Species distribution diagram for the system Cu(II)- H2Dipi - HPhe[Cu(II)] = 3,0 mM, R = 1:1:1


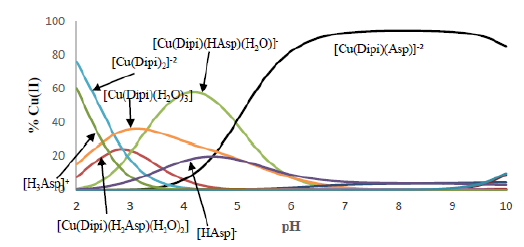


Species distribution diagram for the system Cu(II)- H2Dipi - H2Asp[Cu(II)] = 3,0 mM, R = 1:1:1

Comparison between voltammograms of [Cu(Dipi)(HHis)(H2O)]+ and ligand [HHis]

Comparison between voltammograms of [Cu(Dipi)(Gly)(H2O)]- and ligand [HGly]
